# Supplementary material for: Assessment of Efficacy and Accuracy of Segmentation Methods in Dentomaxillofacial Imaging- A Systematic Review
Source: Research Square preprint supplement (doi:10.21203/rs.3.rs-3958673/v1), 2024-02-20
Supplement: Supplementary file 1 [file 5ebab8f37fa025937f4c4870.docx]

**Article title:** Assessment of efficacy and accuracy of segmentation methods in Dentomaxillofacial imaging- A systematic review

**Journal name:** Artificial Intelligence Review

**Authors name:** Matine Hosseini, Serlie Hartoonian, Mina Mahdian, Gita Khadivi, Mitra Ghazizadeh Ahsaie*

***Corresponding author:** Mitra Ghazizadeh Ahsaie, DDS, MSc, MPH, Assistant Professor, Department of Oral and Maxillofacial Radiology, School of Dentistry, Shahid Beheshti University of Medical Sciences, Tehran, Iran Tel:+989124492493

Email: mitraghazizadeh@sbmu.ac.ir [mitraghazizadeh@gmail.com](mailto:mitraghazizadeh@gmail.com)

**Table 3.** Characteristics of the models developed on advanced dentomaxillofacial imaging among the included studies

| **Author-Year** | **Segmented region** | **Dataset size** | **Scanning Features** | **Segmentation Protocol and Method** | | | **Metric Findings** | | | | | | | | **Conclusion** |
| --- | --- | --- | --- | --- | --- | --- | --- | --- | --- | --- | --- | --- | --- | --- | --- |
|  |  |  |  | **Software** | **Reference Standard** | **Architecture** |  | | | | | | | |  |
| ***CBCT***  **Lesion** |  |  |  |  |  |  |  | | | | | | | |  |
| Hung et al. 2022[1] | Morphological changes of the maxillary sinus mucosa (mucosal thickening(MT) and mucosal retention cysts(MRC)) | 890 sinuses  (training, training-monitoring, and testing datasets at a 7:1:2 ratio) | - | - | - | CNN algorithm built based on V-Net and support vector regression |  | | Low Dose Scans | | | Full Dose Scans | | | The CNN algorithm proposed in this study can accurately detect and segment MT and MRCs in CBCT scans of the maxillary sinus. |
|  | | MT | MRC | Air Space | MT | MRC | Air Space |
| Detection | | 0.91 | 0.84 | - | 0.89 | 0.93 | - |
| Segmentation | | 0.729 | 0.678 | 0.972 | 0.663 | 0.787 | 0.968 |
| Jung et al. 2021[2] | Maxillary Sinus Lesions | 123 | 120 and 90 kVp, 5 and 4 mA, 16.8 and 14.3 s.  FOV=230 x 170 mm and 170x 135 mm  Focal spot=0.58 and 0.70 mm | AVIEW Modeler | Manual Segmentation | 3D nnU-Net |  | | 1st Step  (Manual) | 2nd Step  (Manually modified CNN- Assisted) | | Last Step  (CNN- Assisted) | | | The algorithm made segmentation protocols faster and more accurate. |
| DSC | Air | 0.920 ± 0.17 | 0.925 ±0.16 | | 0.930 ± 0.16 | | |
| Lesion | 0.770 ± 0.18 | 0.750 ± 0.19 | | 0.760 ± 0.18 | | |
| Time |  | 1824.0 s | 493.2 s | | 362.7 s | | |
|  |
| Orhan et al. 2020[3] | Periapical pathosis | 153 | 94 kVp, 14 mA, 360° rotation, 27 s.  FOV=5 x 5.5 (0.075 mm3 and 0.100 mm3 voxel  size), 5 x 5.5 (0.150 mm3 voxel size) and a 10 x 5.5 (0.200 mm3 voxel size) with isotropic voxels. | Diagnocat Inc. | Manual Segmentation | U-Net | The reliability of correctly detecting=92.8%.  R= 0.89 P= 0.95 F= 0.93  There was no significant difference between the two measurement methods (P > 0.05) | | | | | | | | The presented automatic segmentation algorithm showed comparable results of volumetric measurements of the lesions with manual segmentation techniques. |
| Zheng et al.  2020[4] | Dental CBCT  Lesion Detection | Total:20  Training:15  Validation:5 | 110 kVp, 5.14–89.37 mAs.  FOV=  6 × 6 cm, 8 ×  8 cm, 12 × 8 cm, 15 × 12 cm, 15 × 15 cm. | ITK-SNAP | standard Dense U-Net | Anatomically constrained Dense U-Net | P range: 0.83 to 0.9  R range: 0.8 to 0.84  DSC range for lesion detection: 0.672 to 0.741 | | | | | | | | The algorithm performed well and can be used in dental practices. The proposed automatic technique outperformed both the standard Dense UNet and manual segmentation techniques in both lesion detection precision and DICE indices. |
| **Jaws(Maxilla and Mandible)** | |  |  |  |  |  |  | | | | | | | |  |
| Morgan et al.  2022[5] | Maxillary Sinus | 264 sinuses | FOV=  24 × 19, 17 × 12, 16 × 16 , 15 × 12 , 14 × 10 , 10 × 10 , 10 × 5  , 8 × 8  Voxel Size= 0.1-0.3mm | Mimics Innovation Suite (version 23.0, Materialise N.V., Leuven, Belgium) | Semi-automatic segmentation | 3D U-Net | Automatic:  DSC=0.984±0.004  95%HD=0.232±0.059  IoU=0.968±0.008  Average time=24.4 s  Semi-automatic:  Average time=60.8 min(3649.8s) | | | | | | | | The automated segmentation method showed higher accuracy, better consistency, and faster performance compared to the semi-automatic segmentation method. |
| Jeoun et al.  2022[6] | Mandibular Canals | Training:60  Test:20  Validation:20 | 80 kVp and 8 mA  Resolution= 841 x 841 x 289 pixels  Voxel sizes=0.2 x 0.2 x 0.2 mm3, | 3D slicer | Canal-Net, 2D U-Net, SegNet, 3D U-Net, 3D U-Net with MPL (MPL 3D U-Net), and 3D U-Net with ConvLSTM (ConvLSTM 3D U-Net) | Continuity-aware contextual network (Canal‑Net) | Canal-Net:  DSC=0.87±0.05  JI=0.80±0.06  P=0.89±0.06  R=0.88±0.06 | | | | | | | | The method showed superior performance compared to other networks.  The method can be used before extraction and implant surgeries for complication prevention. The proposed automatic segmentation model showed better Dice similarity coefficient scores and mean curve distance compared to other networks such as 2D U-Net, SegNet, 3D U-Net, MPL 3D U-Net, and ConvLSTM 3D U-Net in 2D and 3D performances. In addition, the system improved structural continuity and boundary details of the mandibular canal in CBCT radiographs. |
| Verhelst et al. 2021[7] | Human Mandible | training = 130  test = 30 | 110 kV and 4.3mA  FOV= 24 × 19cm  Voxel size= 0.3mm3 | Image J and Mimics | Manual segmentation | N/A | Automatic segmentation : time= 17s IoU= 94.6%  Semi-automatic segmentation: time= 1218.4s  Refined AI segmentations (RAI): time= 456.5s  IoU= 94.4% | | | | | | | | Comparing the automatic, RAI, and semi-automatic segmentation methods, automatic had the most inter- and intra-observer consistency. Also, the 3 methods showed the accuracy of the same metrics. In addition automatic and RAI techniques could segment structures faster than SA. |
| Wang et al. 2021[8] | Multiclass segmentation of the jaw, the teeth, and the background | 28  (training = 80%  Test = 20%) | N/A | Mimics Innovation Suite (Version 21.0, Materialise NV, Leuven, Belgium) | The AI model was compared with user-refined AI segmentations (RAI) and semi-automatic segmentation (SA) | MS-D network | Time: Auto= 25s Manual= 5h  Jaw: DSC= 0.934 ± 0.019  Teeth: DSC= 0.945 ± 0.021 | | | | | | | | The network showed minor surface deviations in comparison with manual segmentation and also a large overlap with manually segmented structures. Additionally, the automatic method was accurate and fast. |
| Kwak et al.  2020[9] | Mandibular Canal | Train:validation: Test ratio 6:2:2 | 105 kV, 5.0–5.7 mA, a 24 s,  Voxel size= 0.2–  0.3 mm,  FOV= 16 × 16 or 24 × 24 | Mimics 21.0 software (Materialise) | Automatic segmentation with manual segmentation | Mixed-scale dense (MS-D) network architecture | Global accuracy: (highest)  3D UNet:0.99  2D SegNet:0.96 | | | | | | | | The 2D networks can be applied to the segmentation of a small object like a mandibular canal but they have lower class and mean IoU because they ignore the spatial contexts in the third dimension. Among the 2D networks, SegNet showed the highest global and class accuracy. But 3D U-Net showed the highest accuracy in every index compared to 2D systems. |
| Minnema et al.  2018[10] | Bone affected by metal artifacts | 20 | 105 kVp, 6 mA, and an  Voxel size=0.2 mm | "INVIVO (Anatomage,  San Jose, CA, USA)" | 2D SegNet and 2D U-Net and 3D U-Net | SegNet; U-Net with fewer filters than the original U-Net; U-Net with the original number of filters; 3D U-Net | DSC:  MS-D=0.87±0.06  U-Net=0.87±0.07  ResNet=0.86±0.05  snake evolution algorithm=0.78±0.07 | | | | | | | | The automatic segmentation performed by the MSD network could preserve more anatomical details and use fewer trainable parameters compared to U-Net and ResNet CNN architectures. Additionally, all CNN models could outperform the semi-automatic clinical snake evolution algorithm.MS-D successfully segmented the bone structures affected by metal artifacts |
| Manavella et al.  2017[11] | Severely resorbed alveolar sockets | Test:9 | 110 kV, 2 mA, 10 s  slide thickness = 0.4 mm  FOV = 153.60 mm;  Pixels size = 0.3 mm; | 3D slicer | Eight different CNN training strategies, namely 2D (axial, sagittal, and coronal slices), 2.5D (3 and 5 adjacent slices), majority voting, randomly oriented 2D cross-sections and 3D patches | U-Net and the MS-D network | Relative error:  Automatic segmentation with Mimics: 1.5%  Manual segmentation with Mimics:7%  Automatic segmentation with ImageJ:10% | | | | | | | | The Mimics automatic method showed the highest accuracy and inter-observer similarity and also produced the minimum errors compared to the ImageJ automatic method and Mimics manual method. |
| Janssen et al. 2017[12] | Assessment of alveolar cleft grafting procedures (segmentation of the maxillary border adjoining the alveolar  cleft defect) | 11 | 120 k, 3 to 8 mA, 20 s  FOV= 13 cm  Voxel size =0.4 mm. | iCat 3D Imaging System/ Matlab™ (v2012b, Mathworks, Natick, MA, USA)/ Maxilim™ | N/A | N/A | DSC= 0.89  ICC (between the measured volumes of the observers) = 0.98 | | | | | | | | The findings showed that reproducible accurate evaluation of postoperative alveolar bone volume on CBCT radiographs is difficult even when a semi-automated segmentation protocol is used. |
| Xi et al. 2014[13] | 3D reconstruction of the mandibular condyles | 10 | 120 kV, 3–8 mA, 2620 s  FOV= 16 cm diameter/22 cm height Voxel size: 0.4 mm  Radiation dosage: 136 mSv | Matlab/i-CAT, 3D Imaging System | Semi-automated segmentation with controls (The validation group in a previous validation study by Xi et al.) | N/A | DSC= 0.98 | | | | | | | | Compared to other semi-automated models, the presented model could reduce image post-processing time and improve user-friendliness. Also, it could reduce the magnitude of observer-related errors in comparison with manual methods. |
| Antila et al. 2008[14] | Mandibular Bone Geometry | 14 | Resolution=300 x 300 x 288 and 450 x 450 x 450 voxels, Voxel Dimensions= 0.13 x 0.13 x 0.13 and 0.35 x 0.35 x 0.35 mm | N/A | Automatic segmentation with manual segmentation | N/A | mean distance from hand-drawn reference= 0.57 ± 0.16mm  The estimation of tooth orientations was accurate with an error of 0.65 ± 8.0 degrees. | | | | | | | | The segmentation results were very good considering the  amount of artifacts and variability exhibited by the dataset. The segmentation outcomes were good even with the artifacts and variabilities. The model was built with the  application of computing simulated images in mind, but  considering the outcomes, it could be used for stand-alone segmentation applications. |
| **Airways** | |  |  |  |  |  |  | | | | | | | |  |
| Leonardi et al.  2021[15] | Sinonasal cavity and pharyngeal airway | Total=40  Train=20  Test=20 | 120 kVp, 48 mA, 26 s, FOV= 17 cm in height X 23 cm in depth  voxel size=0.3-mm | Mimics | Fully automatic segmentation with automatic and manual segmentations | The architecture consists of a down-sampling path and an up-sampling path, interconnected by skip connections and by the bottleneck layer | Mean volumetric differences between Manual and CNN segmentation= 1.93±0.73 cm3  DSC: between the assessment  done by our automated method and the manual and semiautomatic segmentation were 3.3% and 5.8%, respectively. | | | | | | | | The fully automatic method and the manual method showed similar accuracy and performance. |
| Park et al. 2021[16] | Airway volume | 315  (training = 80%  Test = 20%) | 105–114 KVP, 5.6–6.5 mA  FOV=160 mm x 160 mm  voxel size= 0.3 mm | MATLAB 2020a (MathWorks, Natick, MA, USA) | Fully automatic segmentation with manual segmentation | N/A | Auto vs Manual = The difference in total  volume was measured as 137.256 ± 146.517 mm3 | | | | | | | | A high correlation between manual and DL-based methods was demonstrated. |
| Sin et al. 2021[17] | Pharyngeal airway | training = 214  validation = 46  test = 46 | 120 kVp and 3-5  mA, 12 in (13.48 cm) imaging field | ITK-SNAP | Automatic segmentation with semi-automatic segmentation | U-Net | DSC= 0.919  IoU= 0.993 | | | | | | | | High similarity was achieved between manual and automated segmentation methods. Bigger datasets are required for future development of the model. |
| **Tooth and Pulp Chamber** | |  |  |  |  |  |  | | | | | | | |  |
| Lahoud et al. 2021[18] | Tooth segmentation | training = 2095  optimization = 501 validation = 328 | From previous databases | N/A | Manual with automatic segmentation | N/A | Automatic :  IoU= 0.88  Time = 0.5 minutes  Semi-automatic:  IoU= 0.87  Time = 6.6 minutes | | | | | | | | The AI-based method is more time-efficient than the semi-automated method. ( about 6-12 times faster) |
| Lin et al. 2021[19] | pulp cavity and tooth | training = 25  test = 5  (CBCT+MicroCT) | CBCT:  85 kV, 4mA, 17.5 s.  FOV= 14 cm×14 cm×10 cm  Voxel Size= 100 μm×100 μm×100 μm  Micro-CT:  70 kV, 200 μA, Resolution= 20 μm,  Thick Aluminum Filter =0.5 mm | "3-matic software  (Materialise NV, Leuven, Belgium)" | Automatic segmentation with manual segmentation | Feature pyramid network | Experimental group: (data pipeline were micro-Ct images)  DSC= 96.20±0.58%  PR= 97.31±0.38%  RR= 95.11±0.97%  ASSD= 0.09±0.01mm  HD= 1.54±0.51mm  Control group: (Data pipeline was annotated images by endo specialists)  DSC= 86.75±2.42%  PR= 84.45±7.77%  RR= 89.94±4.56%  ASSD= 0.08±0.02mm  HD= 1.99±0.67mm | | | | | | | | The model performed accurately showing promise for future use in clinic and endo planning. |
| Shaheen et al. 2021[20] | Tooth segmentation and classification | Training = 140  Validation = 35  Test = 11 | 3D Accuitomo:  90 kV,  voxel size: 0.25×0.25×0.25mm3,  FOV: 100.75×100.75×100 mm3 or 170.25×170.25×120 mm3  Newtom VGi evo:  170 and 110 kV,  voxel size: 0.2 × 0.2 × 0.2 mm3,  FOV: 122.8 × 122.8 × 80.2 mm3 or 103.2 × 103.2 × 100.8 mm3 or 244.8 × 244.8 × 188.7 mm3 for | N/A | Automatic segmentation and manual segmentation | 3D U-Net | Automated segmentation : P= 0.98±0.02 R= 0.83±0.05 HF= 0.56±0.38mm  Time =1800 times faster for AI compared to that of an expert.  Classification : R= 98.5% P= 97.9% | | | | | | | | The proposed system is accurate and time-efficient |
| Duan et al. 2021[21] | tooth and pulp cavity | 20 | 85kVp, 10mA, 5000 ms  FOV= 8 cm × 8 cm × 8 cm, and the voxel size= 0.16  × 0.16 × 0.16 mm. | PyTorch and NVIDIA Tesla P4 | N/A | A two-phase network: phase one: RPN (Region Proposal Network) and FPN (Feature Pyramid Network)- Phase two: U-Net | DSC: Single rooted tooth (ST)= 95.7%  Multi-rooted tooth (MT)= 96.2%  pulp of ST = 88.6%  pulp of MT= 87.6% | | | | | | | | The deep learning-based method achieved a high DSC in accurate tooth and pulp cavity segmentation. |
| Zheng et al  2020[22] | First molar Pulp Chamber | Total:180  Training:37  Validation:10  Test:133 | 110 kVp, 5.14–89.37 mAs.  FOV=6 × 6 cm, 8 ×  8 cm, 12 × 8 cm, 15 × 12 cm, 15 × 15 cm. | ITK-SNAP | Between automatic and manual segmentation | N/A | DSC=0.878 | | | | | | | | The method can accurately segment the pulp chamber and estimate the human age. High spatial overlap was reported between manual and automatic segmentation. |
| Penaloza et al. 2016[23] | To test the variability of the volume measurements with different segmentation methods applied in pulp volume reconstruction | 21 | 70 Kv, 8-10 mA, FOV= 50 mm by 37 mm. | NVIDIA Tesla P4 and MIMICS 17.0 (Materialise NV, Leuven, 119 Belgium) | Automated and manual segmentation | U-Net Network | Auto compared to Manual: 1)using each fourth slice = the Pearson’s correlation coefficient (r=0.83), shows a greater correlation between them, 2)using only the first and the last slice (r=0.75) | | | | | | | | For manual and automatic segmentation of different teeth, using the same setting parameters is impossible. Furthermore, manual segmentation is more inaccurate and time-consuming |
| Benyó et al. 2012[24] | Segmentation of teeth and root canals (Identification of dental root canals and their medial line) | Training = 250  Test = 61  (CBCT+MicroCT) | Resolution=1500-3000dpi | N/A | N/A | N/A | Overall success rate = 92.0%  Average processing time : MicroCT= 341 sec CBCT= 0.93 sec | | | | | | | | The segmentation is mostly automatically done. Some manual interventions may be required if needed. |
| **Others** |  |  |  |  |  |  |  | | | | | | | |  |
| Minnema et al. 2021[25] | Compare 8 different CNN training strategies, namely 2D (axial, sagittal, and coronal slices), 2.5D (3 and 5 adjacent slices), majority voting, randomly oriented 2D cross-sections, and 3D patches | - | 90 kVp, 10 mA  Voxel size = 0.2 mm | Mimics and 3-matic software | Compared the gold standard segmentation(semi-automated) and the CNN segmentation | The CNN architecture consisted of four layers: 1. Convolutional layer 2. Activation layer 3. Normalization layer 4. Pooling layer | U-Net | | | Mixed-scale  Dense convolutional neural network (MS-D network) | | | | | The automatic segmentation performed by the MSD  the network could preserve more anatomical details and use  fewer trainable parameters compared to U-Net and ResNet CNN architectures. Additionally, all CNN models could outperform the semi-automatic clinical snake evolution algorithm.MS-D successfully segmented the bone structures affected by metal artifacts. |
| 2D axial | | DSC= 0.805 ± 0.10  Time= 25.6 ± 0.8 | 2D axial | | DSC= 0.809 ± 0.10  Time= 12.4 ± 0.8 | | |
| 2D sagittal | | DSC= 0.802 ± 0.11 | 2D sagittal | | DSC= 0.806 ± 0.10 | | |
| 2D coronal | | DSC= 0.799 ± 0.11 | 2D coronal | | DSC= 0.813 ± 0.10 | | |
| 2.5D (3 adjacent slices) | | DSC= 0.813 ± 0.10  Time= 29.3 ± 1.7 | 2.5D (3 adjacent slices) | | DSC= 0.807 ± 0.09  Time= 14.8 ± 0.7 | | |
| 2.5D (5 adjacent slices) | | DSC= 0.803 ± 0.10 Time= 27.3 ± 0.3 | 2.5D (5 adjacent slices) | | DSC= 0.801 ± 0.09  Time= 15.6 ± 0.7 | | |
| majority voting | | DSC= 0.821 ± 0.11  Time= 3 x  25.6 ± 0.8 | majority voting | | DSC= 0.821 ± 0.10  Time= 3 x  12.4 ± 0.8 | | |
| randomly oriented 2D (cross-sections) | | DSC= 0.811 ± 0.09  Time= 22,9 ± 0.1 | randomly oriented 2D (cross-sections) | | DSC= 0.808 ±0.09  Time= 10,8 ± 1.1 | | |
| 3D patches | | DSC= 0.782 ± 0.13 Time= 259.3 ± 13.5 | 3D patches | | DSC= n.a.  Time= n.a. | | |
| ***MDCT***  **Craniomaxillofacial structures** | |  |  |  |  |  |  | | | | | | | |  |
| Steybe et al.  2022[26] | Craniomaxillofacial structures on head CT | N/A | Voxel size =1 mm3  Fixed matrix size=32x32x32 voxels | NORA imaging platform and Nvidia RTX | Automated with manual segmentation | U-Net | DSC=0.81±0.13 mm  Surface DSC=0.94±0.06 mm  95%HD=1.93±2.05 mm  ASSD=0.42±0.44 mm | | | | | | | | High accuracy was achieved. The approach may assist in maxillofacial surgeries |
| Ryu et al. 2021[27] | upper-airway morphology | training = 73  test = 15 | Resolution=512 ×512  Pixel spacing=0.42–0.51 mm | 3D slicer | Compared network output with manual segmentation | 3D U-Net | ACC = 81.5% SE= 89.3% SP= 86.2% F1= 87.6%  high-resolution model: DSC=0.76 ±0.041  low-resolution model: DSC= 0.74 ±0.052 | | | | | | | | The diagnostic accuracy of Obstructive sleep apnea syndrome is increased with the algorithm. |
| Zhong et al. 2021[28] | organs-at-risk  for head and neck cancer radiotherapy | 364 | 120 kVp, 350 mA  Pixel size= 0.92 × 0.92 mm  Resolution=512 × 512 matrix. | Keras | Automated segmentation with manual segmentation | U-Net | Oral cavity: HD= 8.51 ± 5.54 DSC= 0.93 ± 0.07 | | | | | | | | The model showed an efficient and consistent performance in clinical practice. Reducing the labor-intensive manual segmentation work. |
| Fu et al.  2020[29] | Vessel | 18766 | Patch dimension= 256 × 256 × 256 voxels | ITKSNAP | Automated with manual segmentation | Modified U-net with the addition of bottleneck-ResNet (BR) | ACC=0.931 | | | | | | | | The automated algorithm decreases labor force and time and can assist in the improvement of patient care. |
| Yun et al.  2018[30] | Airway | Total:77  Training:59  Validation:10  Test:8 | patch size=32 × 32 pixels | AVIEWTM (Coreline Soft Inc., Seoul, South Korea) | Automatic segmentation with manual segmentation and semi-automatic segmentation | 2.5D CNN | DSC=0.8997±0.0892  FP=7.74%  Tree length detected=92.16% | | | | | | | | The algorithm can be applied in radiologic practice. |
| Minemma et al.  2018[31] | Bone | Training:20 | N/A | Mimics and 3-matic software | Compared the gold standard segmentation(semi-automated) and the CNN segmentation | The CNN architecture consisted of four layers: 1. Convolutional layer 2. Activation layer 3. Normalization layer 4. Pooling layer | DSC=0.92±0.04 | | | | | | | | The algorithm is time and effort-efficient for bone segmentation. |
| Klinder et al. 2009[32] | Vertebra detection, identification, and segmentation | Training = 10  Test= 64 | Resolution: 0.36 mm to 0.96 mm  Voxel size=  3.0 x 3.0 x 3.0 mm | N/A | The generated ground truths were verified  by a clinical expert. (Manual segmentation) | N/A | mean point-to-surface segmentation error = 1.12 ± 1.04 mm  entire computation time = 179.5 s | | | | | | | | The framework showed considerable results regarding different regions of the spine, e.g., head-neck, thorax, or whole spine images, and not only for one specific type of data. |
| Rueda et al. 2006[33] | Jaw Tissues (cortical bone, trabecular core, and especially  the mandibular canal containing the dental nerve.) | Training = 215  Test = leave-4-out scheme | N/A | N/A | Automated segmented image with the ground truth image | Active Appearance Models | pt.crv : Cortical= 1.63mm Trabecular= 2.90mm Canal= 4.76mm Nerve= 3.40mm | | | | | | | | AAMs can perform automatic and accurate segmentation of various jaw tissues despite the variability of multiple cases. |
| **Tooth** |  |  |  |  |  |  |  | | | | | | | |  |
| Kang et al. 2015[34] | Teeth | 10 | 85 kV, 4mA,  Voxel size=  0.2 × 0.2 × 0.2mm | N/A | Compared the gold standard segmentation(semi-automated) and the CNN segmentation | The CNN architecture consisted of four layers: 1. Convolutional layer 2. Activation layer 3. Normalization layer 4. Pooling layer | The average error = 2.29 ± 0.56% | | | | | | | | The proposed semi-automated method showed more accuracy in comparison to conventional methods. The proposed method  identified the individual teeth accurately, demonstrating that it can give dentists substantial assistance during dental surgery. |
| Thariat et al. 2012[35] | Dental structures (to guide dental care in the context of intensity-modulated radiotherapy) | Training = 42  Test = 8 | N/A | N/A | ground truth the maximum doses estimated from manual contours compared with manual and automatic contours. | N/A | ACC = 75% | | | | | | | | Dose estimation and segmentation using this framework were more practical and suitable for routine use than manual segmentation. |
| Le et al.  2009[36] | Tooth segmentation | - | Resolution=512 × 512 at 0.625  Slice thickness=1.25 mm FOV= 25cm or lesser  Gantry tilt=0◦ | OsiriX | Automated segmented image with the ground truth image | Active Appearance Models | 0.29 mm error from the ideal segmentation | | | | | | | | The algorithm is fast and time-efficient and outperformed previous methods |
| ***Micro-CT***  **Tooth and pulp cavity** |  |  |  |  |  |  |  | | | | | | | |  |
| Lin et al. 2021[19] | Pulp cavity and tooth | training = 25  test = 5 | CBCT:  85 kV, 4mA, 17.5 s.  FOV= 14 cm×14 cm×10 cm  Voxel Size= 100 μm×100 μm×100 μm  Micro-CT:  70 kV, 200 μA, Resolution= 20 μm,  Thick Aluminum Filter =0.5 mm | MIMICS 17.0 (Materialise NV, Leuven, 119 Belgium) | Comparison of segmentation accuracy between the training samples and the CBCT images labeled by an endodontic specialist | U-Net | Experimental group: (data pipeline were micro-CT images)  DSC= 96.20±0.58%  PR= 97.31±0.38%  RR= 95.11±0.97%  ASSD= 0.09±0.01mm  HD= 1.54±0.51mm  Control group: (Data pipeline was annotated images by endo specialists)  DSC= 86.75±2.42%  PR= 84.45±7.77%  RR= 89.94±4.56%  ASSD= 0.08±0.02mm  HD= 1.99±0.67mm | | | | | | | | The model performed accurately showing promise for future use in clinic and endo planning. |
| Queiroz et al. 2017 [37] | Root canal volume and surface area | 31 | 50 kV, 800 µA  Voxel size= 33.21 μm  Thick Aluminium Filter =0.5 mm  Rotation= 360°  Rotation step=0.4° | N/A | N/A | N/A | Automatic : Mean and standard deviation : Canal volume = 2.85 (±1.29)a Canal surface = 26.43 (±6.19)b  Manual : Mean and standard deviation : Canal volume = 2.88 (±1.26)a Canal surface = 26.95 (±8.26)b | | | | | | | | Both automatic and manual methods can be used for pulp volume calculation but automatic segmentation is the best for threshold determination reproducibility. |
| Benyó et al. 2012[24] | Segmentation of teeth and root canals (Identification of dental root canals and their medial line) | Training = 250  Test = 61 | Resolution=1500-3000dpi | Automatic Threshold Tool | To compare visual and automatic segmentation | N/A | Overall success rate = 92.0%  Average processing time : Micro-CT= 341 sec CBCT= 0.93 sec | | | | | | | | The segmentation is mostly automatically done. Some manual interventions may be required if needed. |
| Benyó et al. 2009[38] | detection of the medial  axis of the root canal | - | Resolution=1500-3000dpi | N/A | N/A | N/A | The proposed algorithm can automatically process more than 95% of the recorded image sets, while the rest of the cases need manual interaction. | | | | | | | | The model performs automatically in most cases and is accurate in medial line identification. |
| ***Ultrasonography(US)*** |  |  |  |  |  |  |  | | | | | | | |  |
| Keser et al.  2022[39] | Masseter muscle | Total:388  Training:312  Validation:38  Test:38 | Resolution:  8 MHz | US software | N/A | PyTorch U-Net | F1=1.0  SE=1.0  P=1.0 | | | | | | | | This method can assist clinicians by reducing the diagnosis time. |
| Orhan et al. 2021[40] | Masseter muscles | training = 157  validation = 18  test = 20 | NA | US software | Manual segmentation with automatic segmentation | U-net, Pyramid Scene Parsing Network (PSPNet), and Fuzzy Petri Net (FPN) | FPN: SE= 0.994 SP= 0.990 P= 0.945 ACC= 0.985 F1= 0.932  PSPNet: SE= 0.792 SP= 0.964 P= 0.806 ACC= 0.947 F1= 0.762  U-net: SE= 0.792 SP= 0.990 P= 0.794 ACC= 0.969 F1= 0.847 | | | | | | | | The presented  algorithm had high sensitivity and precision values like  human observers. |
| ***MRI*** |  |  |  |  |  |  |  | | | | | | | |  |
| Ito et al.  2022[41] | Articular Disc of TMJ | 217 | NA | Keras | Compared three fully automated segmentation algorithms: encoder-decoder CNN, U-Net, and SegNet | Encoder-decoder CNN, U-Net, and SegNet |  | | DSC | SE | | P | | | The method can assist clinicians in TMDs. |
| 3DiscNet | | 0.70±0.17 | 0.6±0.20 | | 0.80±0.14 | | |
| UNet | | 0.46±0.14 | 0.44±0.15 | | 0.54±0.19 | | |
| SegNet-Basic | | 0.74±0.12 | 0.70±0.14 | | 0.80±0.13 | | |
| Ruthven et al.  2020[42] | Vocal Cord and articulators | Total= 392 | Matrix size:  256×256 | PyTorch and NVIDIA TITAN RTX graphics card. | Compared Ground truth segmentations and corresponding predicted segmentation after post-processing | Fully convolutional network with a similar architecture to the original U-Net | DSC=0.92  General HD=5mm | | | | | | | | The method can segment the vocal cords and the articulators with high accuracy. |
| Yang et al.  2014[43] | Parotid gland | Test: 42 | Matrix size:  256×256  voxel resolution:  0.8_ 0.8 _ 30 | N/A | Automatic segmentation results were compared with physicians’ manual contours (gold standard) | the kernel support vector machine | DSC:  Left parotid:91.1%±1.6  Right parotid:90.5%±2.4  Average volume difference:  Left:7.98%  Right:8.12% | | | | | | | | The method showed high accuracy and performance in clinical studies. The method can be useful for addressing xerostomia in patients. |

ACC, Accuracy; ASSD, Average Symmetric Surface Distance; AUC, Area Under Curve; CFD, Computational fluid dynamics; CNN, Convolutional Neural Network; DNN, Deep Neural Network; DSC, Dice similarity coefficient; F, F Measure; F1, F1-Score; FOV, Field of View; FP, False Positive; HD, Hausdorff distance; ICC, Interclass Correlation Coefficient; IOU, Intersection Over Union; JI, Jaccard index; P, Precision; PQ, Panoptic quality; PR, Precision Rate; pt.crv, point-to-curve; R, Recall; RQ, recognition quality; RR, Recall Rate; SE, Sensitivity; SP, Specificity; SQ, Segmentation Quality; SVM, Support Vector Machine;

1. Hung, K.F., et al., *Automatic detection and segmentation of morphological changes of the maxillary sinus mucosa on cone-beam computed tomography images using a three-dimensional convolutional neural network.* Clin Oral Investig, 2022. **26**(5): p. 3987-3998.

2. Jung, S.K., et al., *Deep Active Learning for Automatic Segmentation of Maxillary Sinus Lesions Using a Convolutional Neural Network.* Diagnostics (Basel), 2021. **11**(4).

3. Orhan, K., et al., *Evaluation of artificial intelligence for detecting periapical pathosis on cone-beam computed tomography scans.* Int Endod J, 2020. **53**(5): p. 680-689.

4. Zheng, Z., et al., *Anatomically Constrained Deep Learning for Automating Dental CBCT Segmentation and Lesion Detection.* IEEE Transactions on Automation Science and Engineering, 2021. **18**(2): p. 603-614.

5. Morgan, N., et al., *Convolutional neural network for automatic maxillary sinus segmentation on cone-beam computed tomographic images.* Sci Rep, 2022. **12**(1): p. 7523.

6. Jeoun, B.S., et al., *Canal-Net for automatic and robust 3D segmentation of mandibular canals in CBCT images using a continuity-aware contextual network.* Sci Rep, 2022. **12**(1): p. 13460.

7. Verhelst, P.J., et al., *Layered deep learning for automatic mandibular segmentation in cone-beam computed tomography.* J Dent, 2021. **114**: p. 103786.

8. Wang, H., et al., *Multiclass CBCT Image Segmentation for Orthodontics with Deep Learning.* J Dent Res, 2021. **100**(9): p. 943-949.

9. Kwak, G.H., et al., *Automatic mandibular canal detection using a deep convolutional neural network.* Sci Rep, 2020. **10**(1): p. 5711.

10. Minnema, J., et al., *Segmentation of dental cone-beam CT scans affected by metal artifacts using a mixed-scale dense convolutional neural network.* Med Phys, 2019. **46**(11): p. 5027-5035.

11. Manavella, V., et al., *A novel image processing technique for 3D volumetric analysis of severely resorbed alveolar sockets with CBCT.* Minerva Stomatol, 2017. **66**(3): p. 81-90.

12. Janssen, N.G., et al., *A novel semi-automatic segmentation protocol for volumetric assessment of alveolar cleft grafting procedures.* J Craniomaxillofac Surg, 2017. **45**(5): p. 685-689.

13. Xi, T., et al., *A novel region-growing based semi-automatic segmentation protocol for three-dimensional condylar reconstruction using cone beam computed tomography (CBCT).* PLoS One, 2014. **9**(11): p. e111126.

14. Antila, K., et al., *Automatic extraction of mandibular bone geometry for anatomy-based synthetization of radiographs.* Annu Int Conf IEEE Eng Med Biol Soc, 2008. **2008**: p. 490-3.

15. Leonardi, R., et al., *Fully automatic segmentation of sinonasal cavity and pharyngeal airway based on convolutional neural networks.* Am J Orthod Dentofacial Orthop, 2021. **159**(6): p. 824-835.e1.

16. Park, J., et al., *Deep Learning Based Airway Segmentation Using Key Point Prediction.* Applied Sciences, 2021. **11**(8): p. 3501.

17. Sin, Ç., et al., *A deep learning algorithm proposal to automatic pharyngeal airway detection and segmentation on CBCT images.* Orthod Craniofac Res, 2021. **24 Suppl 2**: p. 117-123.

18. Lahoud, P., et al., *Artificial Intelligence for Fast and Accurate 3-Dimensional Tooth Segmentation on Cone-beam Computed Tomography.* J Endod, 2021. **47**(5): p. 827-835.

19. Lin, X., et al., *Micro-Computed Tomography-Guided Artificial Intelligence for Pulp Cavity and Tooth Segmentation on Cone-beam Computed Tomography.* J Endod, 2021. **47**(12): p. 1933-1941.

20. Shaheen, E., et al., *A novel deep learning system for multi-class tooth segmentation and classification on cone beam computed tomography. A validation study.* J Dent, 2021. **115**: p. 103865.

21. Duan, W., et al., *Refined tooth and pulp segmentation using U-Net in CBCT image.* Dentomaxillofacial Radiology, 2021. **50**: p. 20200251.

22. Zheng, Q., et al., *Age estimation based on 3D pulp chamber segmentation of first molars from cone-beam-computed tomography by integrated deep learning and level set.* Int J Legal Med, 2021. **135**(1): p. 365-373.

23. Marroquin Penaloza, T.Y., et al., *Reliability and repeatability of pulp volume reconstruction through three different volume calculations.* J Forensic Odontostomatol, 2016. **34**(2): p. 35-46.

24. Benyó, B., *Identification of dental root canals and their medial line from micro-CT and cone-beam CT records.* Biomed Eng Online, 2012. **11**: p. 81.

25. Minnema, J., et al., *Comparison of convolutional neural network training strategies for cone-beam CT image segmentation.* Comput Methods Programs Biomed, 2021. **207**: p. 106192.

26. Steybe, D., et al., *Automated segmentation of head CT scans for computer-assisted craniomaxillofacial surgery applying a hierarchical patch-based stack of convolutional neural networks.* Int J Comput Assist Radiol Surg, 2022. **17**(11): p. 2093-2101.

27. Ryu, S., et al., *Diagnosis of obstructive sleep apnea with prediction of flow characteristics according to airway morphology automatically extracted from medical images: Computational fluid dynamics and artificial intelligence approach.* Comput Methods Programs Biomed, 2021. **208**: p. 106243.

28. Zhong, Y., et al., *A Preliminary Experience of Implementing Deep-Learning Based Auto-Segmentation in Head and Neck Cancer: A Study on Real-World Clinical Cases.* Front Oncol, 2021. **11**: p. 638197.

29. Fu, F., et al., *Rapid vessel segmentation and reconstruction of head and neck angiograms using 3D convolutional neural network.* Nat Commun, 2020. **11**(1): p. 4829.

30. Yun, J., et al., *Improvement of fully automated airway segmentation on volumetric computed tomographic images using a 2.5 dimensional convolutional neural net.* Med Image Anal, 2019. **51**: p. 13-20.

31. Minnema, J., et al., *CT image segmentation of bone for medical additive manufacturing using a convolutional neural network.* Comput Biol Med, 2018. **103**: p. 130-139.

32. Klinder, T., et al., *Automated model-based vertebra detection, identification, and segmentation in CT images.* Med Image Anal, 2009. **13**(3): p. 471-82.

33. Rueda, S., et al., *Automatic segmentation of jaw tissues in CT using active appearance models and semi-automatic landmarking.* Med Image Comput Comput Assist Interv, 2006. **9**(Pt 1): p. 167-74.

34. Kang, H.C., et al., *Fast and Accurate Semiautomatic Segmentation of Individual Teeth from Dental CT Images.* Comput Math Methods Med, 2015. **2015**: p. 810796.

35. Thariat, J., et al., *Dentalmaps: automatic dental delineation for radiotherapy planning in head-and-neck cancer.* Int J Radiat Oncol Biol Phys, 2012. **82**(5): p. 1858-65.

36. Le, B.H., et al., *An interactive geometric technique for upper and lower teeth segmentation.* Med Image Comput Comput Assist Interv, 2009. **12**(Pt 2): p. 968-75.

37. Queiroz, P.M., et al., *Comparison of automatic and visual methods used for image segmentation in Endodontics: a microCT study.* J Appl Oral Sci, 2017. **25**(6): p. 674-679.

38. Benyo, B., et al., *Detection of the root canal's centerline from dental micro-CT records.* Annu Int Conf IEEE Eng Med Biol Soc, 2009. **2009**: p. 3517-20.

39. Keser, G., et al., *A Deep Learning Approach for Masseter Muscle Segmentation on Ultrasonography.* J Ultrason, 2022. **22**(91): p. e204-e208.

40. Orhan, K., et al., *An Artificial Intelligence Hypothetical Approach for Masseter Muscle Segmentation on Ultrasonography in Patients With Bruxism.* Journal of Advanced Oral Research, 2021. **12**(2): p. 206-213.

41. Ito, S., et al., *Automated segmentation of articular disc of the temporomandibular joint on magnetic resonance images using deep learning.* Sci Rep, 2022. **12**(1): p. 221.

42. Ruthven, M., M.E. Miquel, and A.P. King, *Deep-learning-based segmentation of the vocal tract and articulators in real-time magnetic resonance images of speech.* Comput Methods Programs Biomed, 2021. **198**: p. 105814.

43. Yang, X., et al., *Automated segmentation of the parotid gland based on atlas registration and machine learning: a longitudinal MRI study in head-and-neck radiation therapy.* Int J Radiat Oncol Biol Phys, 2014. **90**(5): p. 1225-33.
