# Supplementary material for: Assessment of Efficacy and Accuracy of Segmentation Methods in Dentomaxillofacial Imaging- A Systematic Review
Source: Research Square preprint supplement (doi:10.21203/rs.3.rs-3958673/v1), 2024-02-20
Supplement: Supplementary file 2 [file 8d35aa84c5a9da34b5427fae.docx]

**Article title:** Assessment of efficacy and accuracy of segmentation methods in Dentomaxillofacial imaging- A systematic review

**Journal name:** Artificial Intelligence Review

**Authors name:** Matine Hosseini, Serlie Hartoonian, Mina Mahdian, Gita Khadivi, Mitra Ghazizadeh Ahsaie*

***Corresponding author:** Mitra Ghazizadeh Ahsaie, DDS, MSc, MPH, Assistant Professor, Department of Oral and Maxillofacial Radiology, School of Dentistry, Shahid Beheshti University of Medical Sciences, Tehran, Iran Tel:+989124492493

Email: mitraghazizadeh@sbmu.ac.ir [mitraghazizadeh@gmail.com](mailto:mitraghazizadeh@gmail.com)

Risk of Bias of the included studies using the QUADAS-2 tool.

Conventional Dentomaxillofacial Imaging:

|  | **Bias** | | | | **Applicability** | | |
| --- | --- | --- | --- | --- | --- | --- | --- |
|  | **Patient Selection** | **Index Test** | **Reference Standard** | **Flow and Timing** | **Patient Selection** | **Index Test** | **Reference Standard** |
| **Vranckx et al. 2020** | Low | Low | Low | Low | Low | Low | Low |
| **Abdi et al. 2015** | Low | Low | Low | Low | Low | Low | Low |
| **Cha et al. 2021** | Low | Low | Low | Low | Low | Low | Low |
| **Lee et al. 2019** | Low | Low | Low | Low | Low | Low | Low |
| **Leite et al. 2020** | Low | High | Low | Low | Low | Low | Low |
| **Li et al. 2005** | High | High | Unclear | Unclear | High | Low | Unclear |
| **Mori et al. 2021** | Low | Low | Low | Low | Low | Low | Low |
| **Li et al. 2006** | Low | Low | Low | Unclear | High | Low | High |
| **Vinayahalingam et al. 2019** | Low | Low | Low | Low | Low | Low | Low |

**Advanced Dentomaxillofacial Imaging:**

|  | **Bias** | | | | **Applicability** | | |
| --- | --- | --- | --- | --- | --- | --- | --- |
| **CBCT** | **Patient Selection** | **Index Test** | **Reference Standard** | **Flow and Timing** | **Patient Selection** | **Index Test** | **Reference Standard** |
| **Orhan et al. 2020** | Low | Low | Low | Low | Low | Low | Low |
| **Zheng et al. 2020** | Low | Low | Low | Low | Unclear | Low | Low |
| **Morgan et al. 2022** | Low | Low | Low | Low | Low | Low | Low |
| **Jeoun et al. 2022** | Low | Low | Low | Low | Low | Low | Low |
| **Manavella et al. 2022** | Low | Low | Low | Low | Low | Low | Low |
| **Verhelst et al. 2021** | Low | Low | Low | Low | Low | Low | Low |
| **Wang et al. 2021** | Low | Low | Low | Low | Low | Low | Low |
| **Kwark et al. 2020** | Low | Low | Low | Low | Low | Low | Low |
| **Minnema et al. 2019** | Low | Low | Low | Low | Low | Low | Low |
| **Janssen et al. 2017** | Low | High | Unclear | Unclear | Low | Low | Unclear |
| **Xi et al. 2014** | Low | High | Low | Low | Low | Low | Low |
| **Antila et al. 2008** | Low | High | Unclear | Unclear | High | Low | Unclear |
| **Leonardi et al. 2020** | Low | Low | Low | Low | Low | Low | Low |
| **Park et al. 2021** | Low | Low | Low | Low | Low | Low | Low |
| **Sin et al. 2021** | Low | Low | Low | Low | Low | Low | Low |
| **Zheng et al 2020** | Low | Low | Low | Low | Low | Low | Low |
| **Lahoud et al. 2021** | Low | Low | Low | Low | Low | Low | Low |
| **Shaheen et al. 2021** | Low | Low | Low | Low | Low | Low | Low |
| **Duan et al. 2021** | Low | Low | Unclear | Unclear | Low | Low | Unclear |
| **Penaloza et al. 2016** | Low | Low | Low | Low | Low | Low | Low |
| **Lin et al. 2021** | Low | Low | Low | Low | Low | Low | Low |
| **Benyó et al. 2012** | Low | Low | Low | Low | Low | Low | Low |
| **Minnema et al. 2021** | Low | Low | Unclear | Unclear | Low | Low | Unclear |

|  | **Bias** | | | | **Applicability** | | |
| --- | --- | --- | --- | --- | --- | --- | --- |
| **MDCT** | **Patient Selection** | **Index Test** | **Reference Standard** | **Flow and Timing** | **Patient Selection** | **Index Test** | **Reference Standard** |
| **Steybe et al. 2022** | Low | Low | Low | Low | Low | Low | Low |
| **Ryu et al. 2021** | Low | Low | Low | Low | Low | Low | Low |
| **Zhong et al. 2021** | Low | Low | Low | Low | Low | Low | Low |
| **Fu et al. 2020** | Low | Low | Low | Low | Low | Low | Low |
| **Yun et al. 2018** | Low | Low | Low | Low | Low | Low | Low |
| **Minemma et al. 2018** | Low | Low | Low | Low | High | Low | Low |
| **Rueda et al. 2006** | Low | Low | Unclear | Unclear | Unclear | Low | Unclear |
| **Kang et al. 2015** | Low | High | Unclear | Unclear | High | Low | High |
| **Thariat et al. 2012 2019** | Low | Low | Low | Low | Low | Low | Low |
| **Le et al. 2009** | Low | Low | Unclear | Unclear | Low | Low | Unclear |
| **Klinder et al. 2009** | Low | Low | Low | Low | Low | Low | Low |

|  | **Bias** | | | | **Applicability** | | |
| --- | --- | --- | --- | --- | --- | --- | --- |
| **Micro-CT** | **Patient Selection** | **Index Test** | **Reference Standard** | **Flow and Timing** | **Patient Selection** | **Index Test** | **Reference Standard** |
| **Lin et al. 2021** | Low | Low | Low | Low | Low | Low | Low |
| **Benyó et al. 2012** | Low | Low | Low | Low | Low | Low | Low |
| **Queiroz et al. 2017** | Low | Unclear | Unclear | Low | Low | Low | Low |
| **Benyó et al. 2009** | Low | Low | Unclear | Unclear | Unclear | Low | Unclear |

|  | **Bias** | | | | **Applicability** | | |
| --- | --- | --- | --- | --- | --- | --- | --- |
| **MRI** | **Patient Selection** | **Index Test** | **Reference Standard** | **Flow and Timing** | **Patient Selection** | **Index Test** | **Reference Standard** |
| **Ito et al. 2022** | Low | Low | Low | Low | Low | Low | Low |
| **Ruthven et al. 2020** | Low | Low | Low | Low | Low | Low | Low |
| **Yang et al. 2014** | Low | Low | Low | Low | Low | Low | Low |

|  | **Bias** | | | | **Applicability** | | |
| --- | --- | --- | --- | --- | --- | --- | --- |
| **US** | **Patient Selection** | **Index Test** | **Reference Standard** | **Flow and Timing** | **Patient Selection** | **Index Test** | **Reference Standard** |
| **Keser et al. 2022** | Low | Low | Low | Low | Low | Low | Low |
| **Orhan et al. 2021** | Low | Low | Low | Low | Low | Low | Low |

Supplementary Table**.** Description of quality assessment and rating guidelines based on QUADAS-2 domains used to evaluate the methodological quality of the studies included

| Domain | Subject selection | Index test (AI) | Reference standard | Work-flow |
| --- | --- | --- | --- | --- |
| Concern |  |  |  |  |
| Concerns regarding “applicability” | - detailed explanation of the data sets used to create an AI model | - AI-related diagnostic index tests that are relevant to the research question. | - Choosing a dependable reference standard involves using expert judgment or other suitable methods | _ |
| Concerns regarding “risk of bias” | - If an AI model was created to diagnose or classify a specific condition, the datasets included images from both individuals with the condition of interest and individuals without it | - The AI model's performance is assessed using an independent testing dataset that was not used during the model's development - The images utilized for model development and evaluation were labeled accurately; - The decision-making process involved no human intervention | - The chosen reference is expected to provide accurate diagnosis, measurement, or segmentation; - The results of the reference standard are interpreted without any knowledge of the AI model's outcomes. | - If the reference standard used does not rely on images, there will be no time gap between the reference and the images |

AI, artificial intelligence
